# Supplementary material for: Long noncoding RNA UCA1 from hypoxia-conditioned hMSC-derived exosomes: a novel molecular target for cardioprotection through miR-873-5p/XIAP axis
Source: PubMed Central journal article supplement (PMC7442657; doi:10.1038/s41419-020-02783-5), 2020-08-10
Supplement: 41419_2020_2783_MOESM3_ESM.pdf [file 41419_2020_2783_MOESM3_ESM.pdf]

**Supplementary Figure 1.** (A) and (B) Representative western blot images and quantified data of BAX, BCL-2, P53 and cleaved-caspase3 protein levels in H9c2 cells (H/SD condition) treated with PBS, Nor-exo or Hypo-exo (n=3). Data are presented as mean  $\pm$  SEM. Statistical analysis was performed with one-way ANOVA followed by Bonferroni's correction. \*P < 0.05.
